# Supplementary material
Source: PubMed Central journal article supplement (PMC2492490)
Supplement: 0804346105_0804346105SI.pdf [file 0804346105_0804346105SI.pdf]

# Supporting Information

Wiktor-Brown *et al.* 10.1073/pnas.0804346105

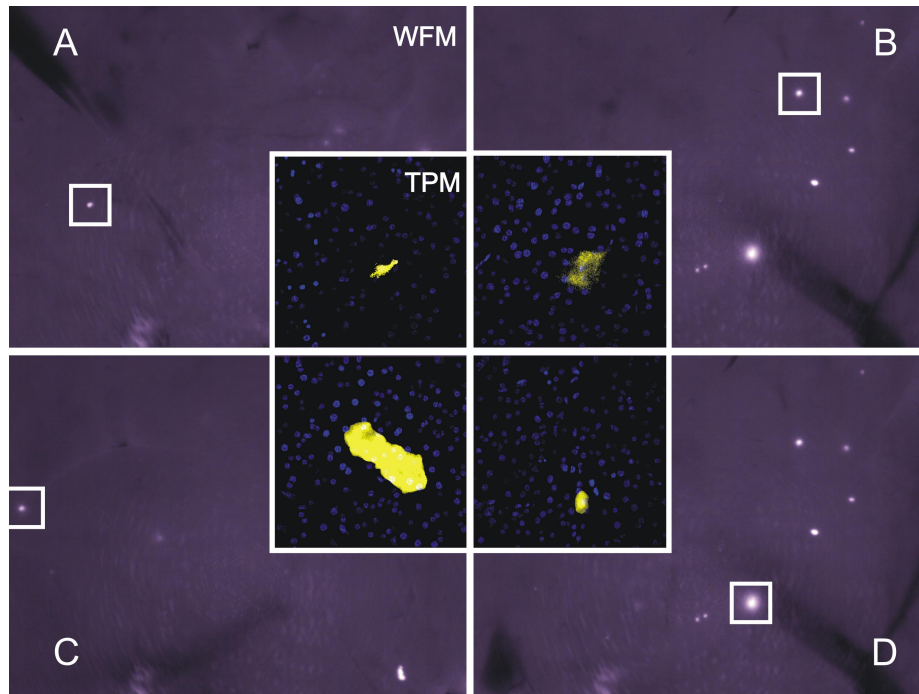

**Fig. S1.** EYFP cell cluster size estimation using both wide-field fluorescence microscopy (WFM) and two-photon microscopy (TPM). WFM image shows that the approximate size of the foci can only be estimated. Except for foci very close to the tissue surface, cell boundaries cannot be seen. Within each WFM image, a focus was selected (indicated by white square) for additional TPM analysis. (*Inset*) TPM image of the largest cross-section of each selected focus TPM. Image shows an overlay of blue and yellow spectral channels in a field of view of  $\approx 240 \times 240 \mu\text{m}$ . Although the foci imaged by WFM in A–C appear to have similar size, high-resolution, 3D-resolved TPM imaging reveals that the foci contain very different number of cells. The WFM image of the foci in D appears larger but only contains a single cell as shown by TPM.
